# Supplementary material for: Influence of Anode Potentials on Current Generation and Extracellular Electron Transfer Paths of Geobacter Species
Source: MDPI journal article supplement (doi:10.3390/ijms18010108), 2017-01-06
Supplement: s1 [file s1]

## Supplementary Materials: Influence of Anode Potentials on Current Generation and Extracellular Electron Transfer Paths of *Geobacter* Species

Souichiro Kato

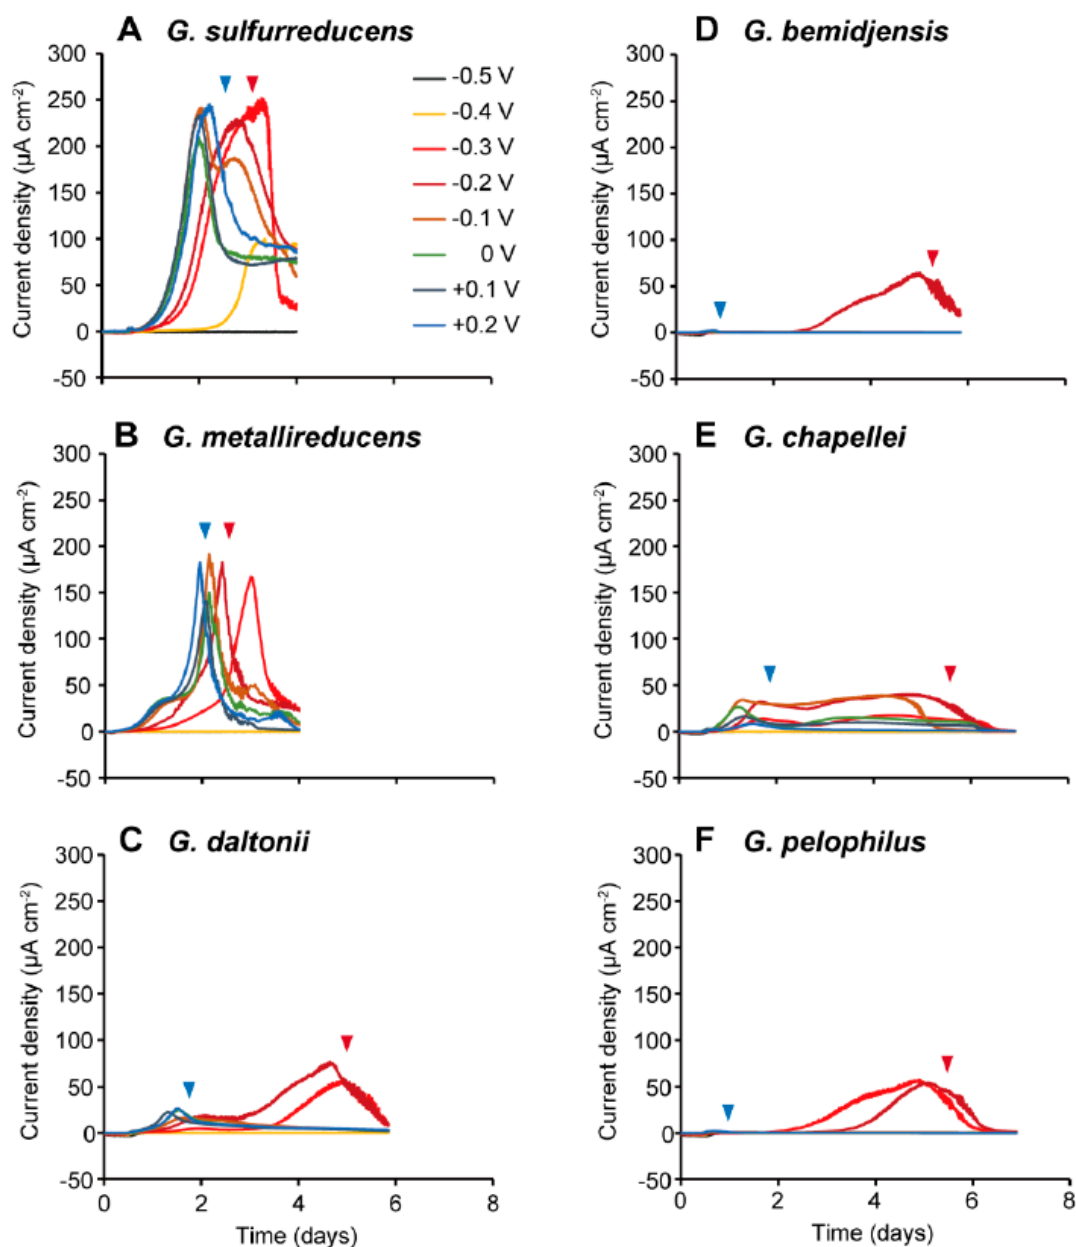

**Figure S1.** The current–time plots of *Geobacter* species grown with different anode potentials. Red and blue arrowheads represent the time points of linear sweep voltammetry (LSV) analyses for  $-0.2$  and  $+0.2$  V cultures, respectively. The experiments were conducted in triplicate, and the figure shows the representative one.
